# Supplementary material
Source: PubMed Central journal article supplement (PMC4788340)
Supplement: vaid859264.ww2_default.pdf [file vaid859264.ww2_default.pdf]

Web appendix 2: Complete abstracted dataset from vital statistics sources

| Country       | Birth cohort years | Vital Statistics Year | Mid cohort age (rounded) | Denominator population males | Denominator population females | Male heart disease mortality rate (US - total; England/Wales - ischemic) | Female heart disease mortality rate (US - total; England/Wales - ischemic) | Female breast cancer mortality rate |
|---------------|--------------------|-----------------------|--------------------------|------------------------------|--------------------------------|--------------------------------------------------------------------------|----------------------------------------------------------------------------|-------------------------------------|
| England/Wales | 1916-1925          | 1950                  | 30                       | 3188000                      | 3220000                        | 3.17                                                                     | 0.59                                                                       |                                     |
| England/Wales | 1916-1925          | 1960                  | 40                       | 3094000                      | 3171000                        | 48.09                                                                    | 6.09                                                                       | 3.14                                |
| England/Wales | 1916-1925          | 1970                  | 50                       | 2963300                      | 3073400                        | 263.73                                                                   | 42.01                                                                      | 19.43                               |
| England/Wales | 1916-1925          | 1980                  | 60                       | 2635800                      | 2872900                        | 710.18                                                                   | 202.83                                                                     | 62.05                               |
| England/Wales | 1916-1925          | 1990                  | 70                       | 2010000                      | 2477900                        | 1314.88                                                                  | 565.64                                                                     | 97.53                               |
| England/Wales | 1916-1925          | 2000                  | 80                       | 1148500                      | 1758300                        | 1891.51                                                                  | 1050.11                                                                    | 133.54                              |
| England/Wales | 1926-1935          | 1950                  | 20                       | 2832000                      | 2899000                        | 0.424                                                                    | 0.03                                                                       | 157.25                              |
| England/Wales | 1926-1935          | 1960                  | 30                       | 2930000                      | 2907000                        | 6.35                                                                     | 0.59                                                                       |                                     |
| England/Wales | 1926-1935          | 1970                  | 40                       | 2909800                      | 2875000                        | 65.5                                                                     | 10.16                                                                      | 3.30                                |
| England/Wales | 1926-1935          | 1980                  | 50                       | 2786100                      | 2793700                        | 261.08                                                                   | 45.60                                                                      | 24.59                               |
| England/Wales | 1926-1935          | 1990                  | 60                       | 2526500                      | 2634000                        | 520.36                                                                   | 169.36                                                                     | 67.04                               |
| England/Wales | 1926-1935          | 2000                  | 70                       | 2040200                      | 2332100                        | 805.56                                                                   | 333.43                                                                     | 101.37                              |
| England/Wales | 1936-1945          | 1950                  | 10                       | 3011000                      | 2894000                        | 0.0664                                                                   | 0.00                                                                       | 98.71                               |
| England/Wales | 1936-1945          | 1960                  | 20                       | 2985000                      | 2967000                        | 0.268                                                                    | 0.14                                                                       |                                     |
| England/Wales | 1936-1945          | 1970                  | 30                       | 3068700                      | 2979700                        | 6.52                                                                     | 0.84                                                                       | 3.59                                |
| England/Wales | 1936-1945          | 1980                  | 40                       | 2988400                      | 2921800                        | 53.84                                                                    | 8.39                                                                       | 23.24                               |
| England/Wales | 1936-1945          | 1990                  | 50                       | 2871400                      | 2861000                        | 154.35                                                                   | 31.14                                                                      | 58.27                               |
| England/Wales | 1936-1945          | 2000                  | 60                       | 2687900                      | 2758900                        | 282.08                                                                   | 78.22                                                                      | 71.91                               |
| US            | 1916-1925          | 1950                  | 30                       | 11596801                     | 12162466                       | 22.90                                                                    | 16.20                                                                      | 3.80                                |
| US            | 1916-1925          | 1960                  | 40                       | 11755393                     | 12325959                       | 112.70                                                                   | 38.20                                                                      | 20.20                               |
| US            | 1916-1925          | 1970                  | 50                       | 11199250                     | 12020707                       | 376.40                                                                   | 109.90                                                                     | 52.60                               |
| US            | 1916-1925          | 1980                  | 60                       | 10151755                     | 11551120                       | 746.80                                                                   | 272.10                                                                     | 80.50                               |
| US            | 1916-1925          | 1990                  | 70                       | 7906814                      | 10138681                       | 1250.00                                                                  | 616.80                                                                     | 111.70                              |
| US            | 1916-1925          | 2000                  | 80                       | 4879353                      | 7481827                        | 2248.10                                                                  | 1475.10                                                                    | 128.90                              |
| US            | 1926-1935          | 1950                  | 20                       | 10917635                     | 11180791                       | 6.80                                                                     | 6.70                                                                       |                                     |
| US            | 1926-1935          | 1960                  | 30                       | 11179299                     | 11639011                       | 20.10                                                                    | 11.30                                                                      | 3.80                                |
| US            | 1926-1935          | 1970                  | 40                       | 11231236                     | 11856569                       | 103.20                                                                   | 32.20                                                                      | 20.40                               |

|    |           |      |    |          |          |        |        |       |
|----|-----------|------|----|----------|----------|--------|--------|-------|
| US | 1926-1935 | 1980 | 50 | 11008919 | 11790868 | 282.60 | 84.50  | 48.10 |
| US | 1926-1935 | 1990 | 60 | 9955069  | 11157583 | 537.30 | 215.70 | 78.60 |
| US | 1926-1935 | 2000 | 70 | 8303274  | 10087712 | 898.30 | 474.00 | 88.30 |
| US | 1936-1945 | 1950 | 10 | 12374954 | 11943999 | 2.00   | 2.20   |       |
| US | 1936-1945 | 1960 | 20 | 11906001 | 12114003 | 4.20   | 3.70   |       |
| US | 1936-1945 | 1970 | 30 | 12217357 | 12690072 | 15.20  | 7.70   | 3.90  |
| US | 1936-1945 | 1980 | 40 | 12569719 | 13064991 | 68.70  | 21.40  | 17.90 |
| US | 1936-1945 | 1990 | 50 | 12232301 | 12824349 | 183.00 | 61.00  | 45.40 |
| US | 1936-1945 | 2000 | 60 | 11645356 | 12629328 | 371.70 | 159.30 | 59.30 |
