# Supplementary material
Source: PubMed Central journal article supplement (PMC4788340)
Supplement: vaid859264.ww3_default.pdf [file vaid859264.ww3_default.pdf]

### Web appendix 3

**Appendix Table 1:** Total heart disease and female breast cancer-specific mortality relationships (United States birth cohorts 1915-1924, 1925-1934, 1935-1944), by sex

| Model                           |                       | Men (THD)       |                         | Women (THD)    |                         | Women (Breast Cancer) |                         |
|---------------------------------|-----------------------|-----------------|-------------------------|----------------|-------------------------|-----------------------|-------------------------|
|                                 |                       | $\beta$ , p     | Deviance, $\Delta$ AIC* | $\beta$ , p    | Deviance, $\Delta$ AIC* | $\beta$ , p           | Deviance, $\Delta$ AIC* |
| Linear                          | Overall slope         | 24.6, p<0.001   | Ref                     | 13.7, p<0.001  | Ref                     | 2.5, p<0.001          | Ref                     |
| Log-linear                      | Overall slope         | 6.3% p<0.001    | -64, -64                | 9.0%, p<0.001  | -120, -120              | 4.2%, p<0.001         | +17, +17                |
| Linear with spline (45 yr)      | Slope <45 yr          | -2.8 p=0.56     | -21, -19                | -4.9, p=0.22   | -17, -15                | 2.0, p<0.001          | -2, 0                   |
|                                 | $\Delta$ slope >45 yr | 52.8, p<0.001   |                         | 37.2, p<0.001  |                         | 0.7 p=0.14            |                         |
| Log-linear with spline 45 years | Slope <45 yr          | 18.9%, p<0.001  | -103, -101              | 11.9%, p<0.001 | -126, -124              | 18.8%, p<0.001        | -5, -3                  |
|                                 | $\Delta$ slope >45yr  | -10.9%, p<0.001 |                         | -2.6%, p=0.028 |                         | -13.5%, p<0.001       |                         |

W: women; M: men, Linear model: slopes represent increase in deaths per 100000 per year of age; log-linear model: slopes represent percent increase in death rate/year of age, \* Lower, i.e., more negative, deviance, defined as  $\log_e(\text{likelihood}_{\text{reference}}^2/\text{likelihood}_{\text{model}}^2)$  indicates better model fit. The difference in AIC, the Akaike Information Criterion penalizes the deviance metric for the addition of extra parameters in the interest of model parsimony. A reduction of  $\geq 4$  logarithmic units in the AIC is considered a significant improvement, while a reduction of  $\geq 10$  logarithmic units is considered a highly significant improvement in model fit. (Modified from Burnham KP, Anderson DR. *Multimodel Inference: Understanding AIC and BIC in Model Selection. Sociological Methods and Research* 2004;33(2):261-304.) Spline models included the variable “age-spline” was equal to 0 if mid-decadal age was <50 (i.e., younger than the 45-54 year-old cohort, i.e., age<45), and equal to the mid-decadal age for older ages.
